# Supplementary material for: Rme-8 depletion perturbs Notch recycling and predisposes to pathogenic signaling
Source: PubMed Central journal article supplement — J Cell Biol. 2015 Jul 20;210(2):303–18. doi: 10.1083/jcb.201411001 (PMC4508892; doi:10.1083/jcb.201411001), 2015-07-20
Supplement: supp_jcb.201411001_JCB_201411001_sm.pdf [file supp_jcb.201411001_JCB_201411001_sm.pdf]

Gomez-Lamarca et al., <http://www.jcb.org/cgi/content/full/jcb.201411001/DC1>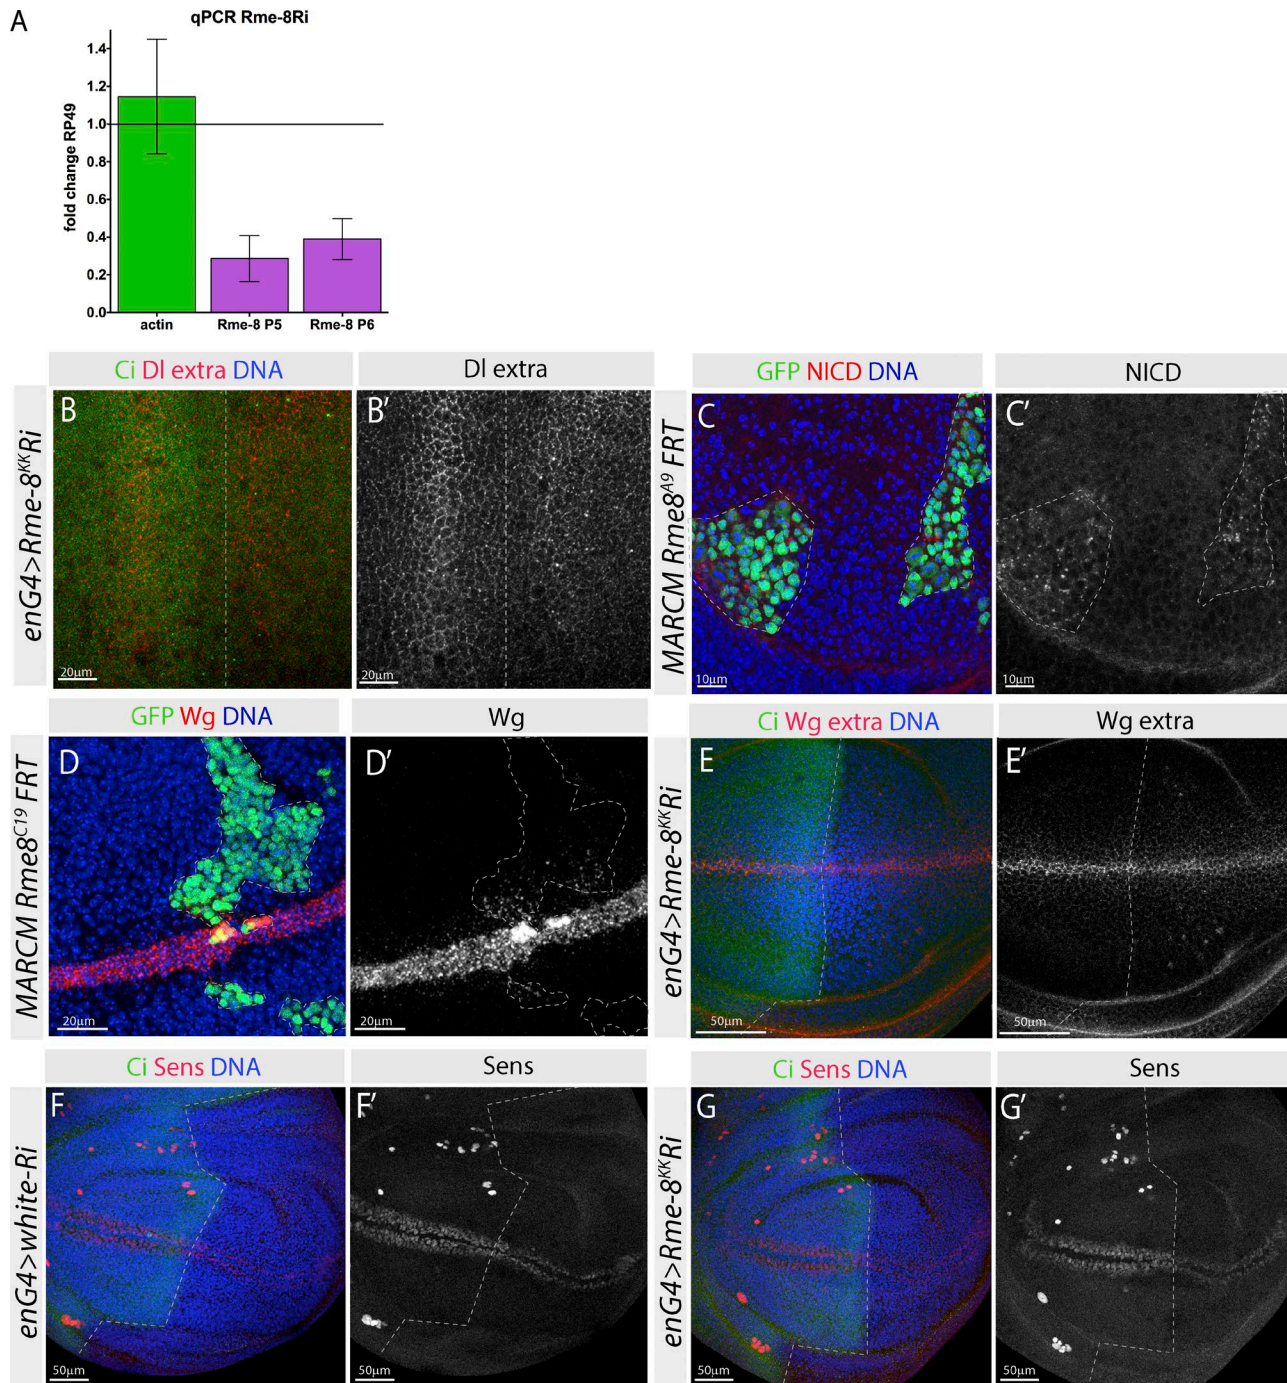

Figure S1. ***Rme-8* Ri knockdown and phenotypes.** (A) Graph showing reduction of *Rme-8* mRNA levels respect to those of a highly expressed gene, *actin*, measured by quantitative PCR (qPCR) using two pairs of primers that target different regions of the gene. Bars indicate SEM. Horizontal line indicates fold change = 1 (expected result if RNA levels were unaffected). (B and B') Wing imaginal disc stained for Ci, DI extracellular (red in B; white in B') and Hoechst (blue), shows reduction of DI membrane levels in *Rme-8* knockdown cells (right from dotted line). (C and C') *Rme-8<sup>A9</sup>* mutant clones (green, outlined by the dotted lines) generated by MARCM system show accumulation of intracellular Notch (red in C; white in C'). (D and D') *Rme-8<sup>C19</sup>* mutant clones (green, outlined by the dotted lines) generated by MARCM system show accumulation of intracellular Wg (red in C; white in C') both inside the receiving cells far from the source of Wg secretion and, to a lesser extent, inside the producing cells. (E and E') Wing imaginal disc stained for Ci, Wg extracellular (red in E; white in E') and Hoechst (blue), shows no difference in Wg extracellular levels in *Rme-8* knockdown cells (right from dotted line). (F-G') Wing imaginal discs stained for Ci, Senseless (red in F and G; white in F' and G'), and Hoechst (blue) show no change in Senseless levels of expression in *Rme-8* knockdown cells (right from dotted line in G) compared with WT (*white-Ri*, right from dotted line in F).

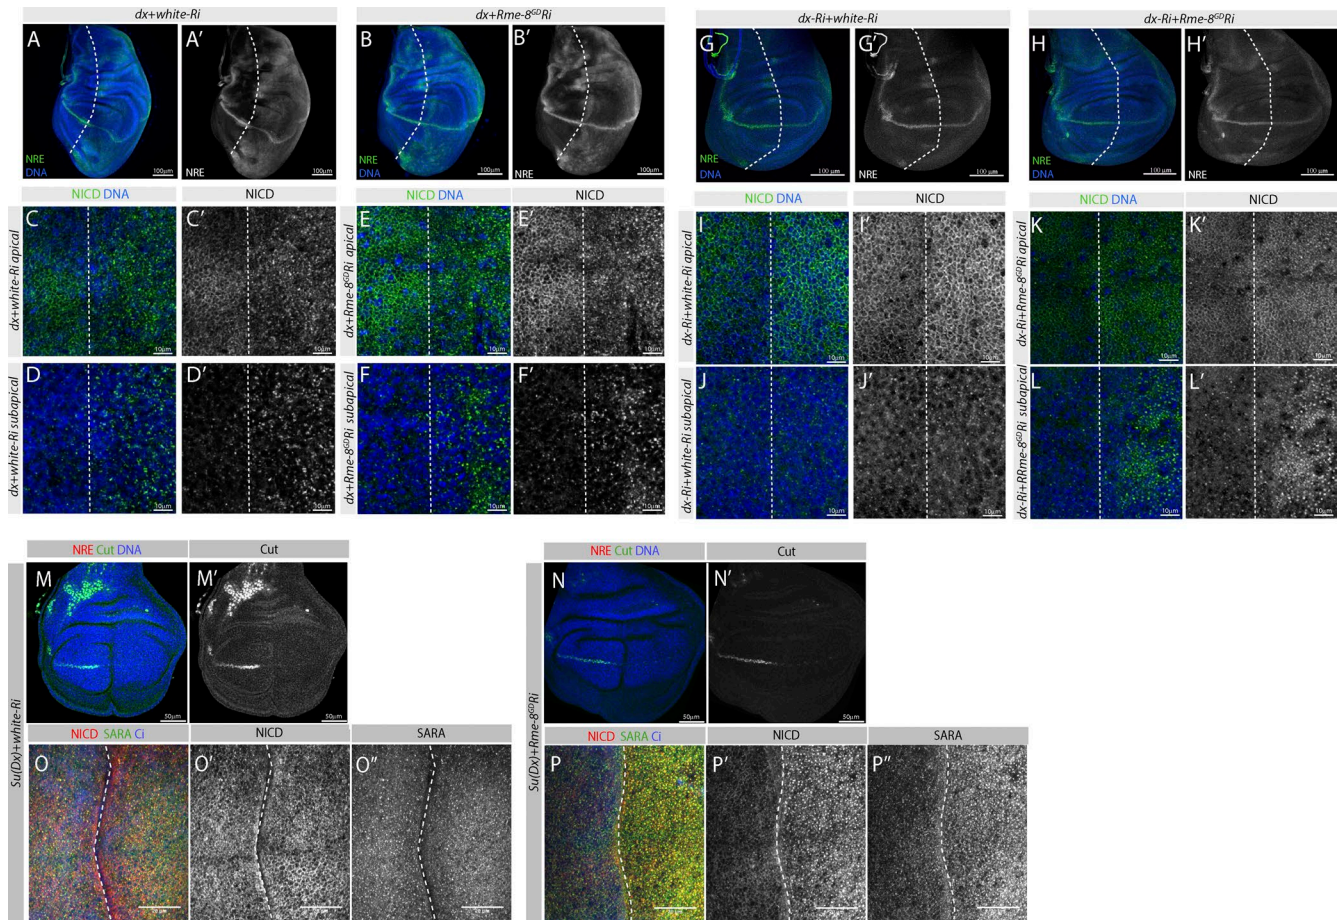

**Figure S2. *Rme-8* appears regulate Notch trafficking independently of *Dx* and *Su(dx)*.** (A–B') NRE-GFP expression (green in A and B; white in A' and B') is detected throughout the domain of *Dx* overexpression (A, right of dotted line) and is not rescued by depletion of *Rme-8* (B, right of dotted line). (C–F') Notch (green, in C–F; white in C'–F') is depleted from the apical membrane and accumulates intracellularly in both *dx*-expressing (C and D, respectively) and *dx+Rme8-Ri*-expressing cells (E and F, respectively). Images are from third-instar wing discs expressing either *dx+white-Ri* (A, C, and D) or *dx+Rme8-Ri* (B, E, and F) in the posterior compartment (right of dashed lines). (G–H') NRE-GFP expression (green in G and H; white in G' and H') is still expressed at the D/V boundary when *dx* is depleted (G, right of dotted line) but is detectably reduced when *Rme-8* is also knocked down (H, right of dotted line). (I–L') Notch (green in I–L; white in I'–L') accumulates at the apical membrane in both *dx-Ri*-expressing (I and J) and *dx-Ri+Rme8-Ri*-expressing cells (K and L) but in subapical endosomes only in *dx-Ri+Rme8-Ri*-expressing cells (K and L). Images are from third-instar wing discs expressing either *dx-Ri+white-Ri* (G, I, and J) or *dx-Ri+Rme8-Ri* (H, K, and L) in the posterior compartment (right of dashed lines). (M–N') Cut expression (red in M and N; white in M' and N') is depleted at the D/V boundary when *Su(dx)* is overexpressed alone (M, right of dotted line) or in combination with *Rme-8* knockdown (N, right of dotted line). (O–P') Distribution of NICD (red in O and P; white in O' and P'), SARA (green M and N; white in O'' and P'') and Ci from wing discs expressing *Su(dx)+white-Ri* (O) or *Su(dx)+Rme-8-Ri* (P), showing that *Rme-8* does not modified *Su(dx)* phenotype.

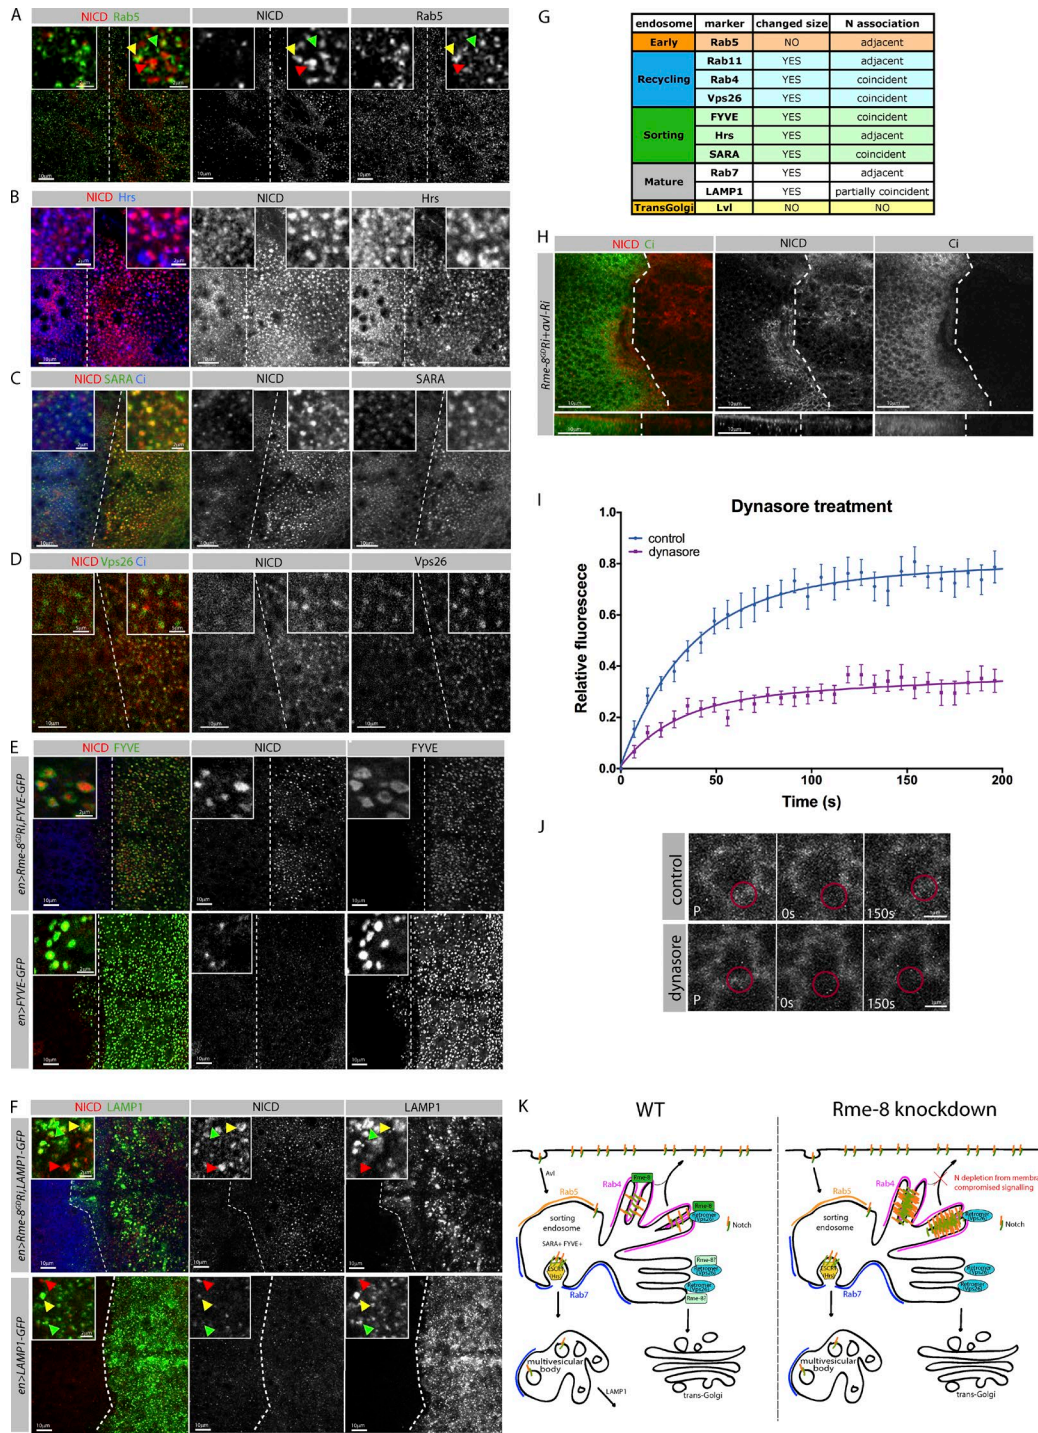

**Figure S3. Notch associates with enlarged endosomes.** (A–D) Relationship between Notch (NICD) and endocytic proteins in wing discs expressing *Rme-8-Ri* in the posterior compartment (right side of dashed line). (A) Enlarged puncta containing NICD but not Rab5 are detected in the *Rme-8*-depleted cells, NICD appears to accumulate away from Rab5 (see insets). (B) Enlarged puncta containing NICD and Hrs are detected in the *Rme-8*-depleted cells, NICD appears to accumulate beside Hrs (see insets). (C) Enlarged puncta containing NICD and SARA are detected in the *Rme-8* depleted cells; NICD appears to colocalize with SARA (see insets). (D) Enlarged puncta containing NICD and Vps26 are detected in the *Rme-8*-depleted cells; NICD colocalizes with Vps26 (see insets). (E) Enlarged NICD puncta appear surrounded by FYVE. Similar relationship is detected in WT tissues, where the puncta are smaller; FYVE-GFP expression alone does substantially alter the Notch accumulations (insets). (F) Enlarged puncta containing NICD and LAMP1 are detected in the *Rme-8*-depleted cells. Some puncta contain both proteins (insets, yellow arrowheads) others contain LAMP1 only (insets, green arrowheads), or NICD only (insets, red arrowheads). LAMP1 distribution is also disrupted in comparison to controls (bottom). Expression of LAMP1-GFP alone does not lead to altered accumulation of NICD. (G) Summary table with relevant information about the endosomal markers analyzed in *Rme-8* depleted cells. (H) *Avl* knockdown suppresses Notch accumulation in *Rme-8*-depleted cells. Distribution of NICD (left, red; right, white) and Ci (left, green; right, white) from wing discs expressing *avl-Ri+Rme-8-Ri*; xy section of discs at the subapical plane (top) and xz cross sections of the same specimens (bottom). (I and J) FRAP experiments, measuring recovery of Notch-GFP after photobleaching. (I) Plot of averaged recovery curves (mean  $\pm$  SEM) from Notch-GFP FRAP experiments with best-fit curves as solid lines of WT and dynasore-treated discs. (J) Single FRAP examples with red circles showing the bleach spots. P, prebleach. (K) Proposed model of *Rme-8* function in WT and subsequent *n* trafficking changes in *Rme-8*-depleted conditions.

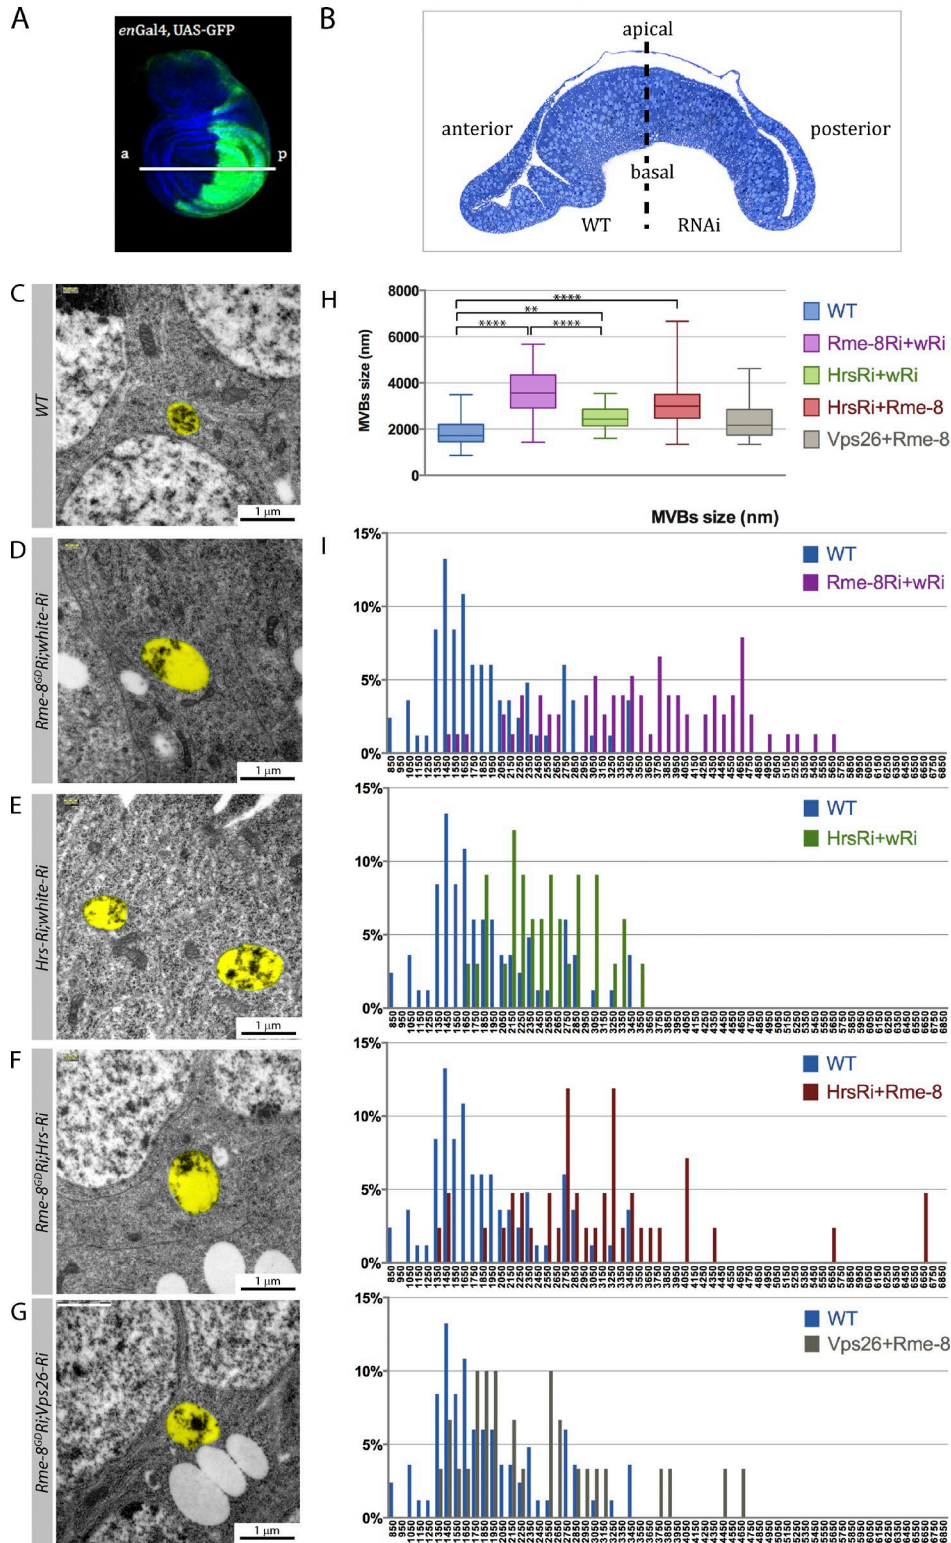

Figure S4. **TEM analysis of *Rme-8*, *Hrs*, and *Vps26* knockdowns.** (A) Wing disc stained for Hoechst (blue), showing the expression pattern of *en-Gal4* revealed by *UAS-GFP* (green), which was used to express different *UAS Ri*. The discs were sectioned at the level of the white line. a, anterior; p, posterior (B) Semi-cross section at the level indicated by the white line in A. Phenotypes of the posterior cells were compared with the anterior WT cells. (C–G) Representative MVBs highlighted in pseudocolor (yellow) of anterior WT (C), posterior *Rme-8*-depleted (D), *Hrs*-depleted (E), *Rme-8+Hrs*-depleted (F), and *Rme-8+Vps26*-depleted (G) cells. The MVBs of all knockdown conditions are enlarged compared with the control, except those of the *Rme-8+Vps26* double knockdown. (H) Box plot and statistical analysis of the perimeter of the MVBs. All measurements from anterior compartment MVBs in the four knockdown experiments were included in the WT group for the statistical analysis. Asterisks indicate statistical differences. \*\*,  $P = 0.01–0.001$ ; \*\*\*\*,  $P < 0.0001$ . WT  $n = 83$ , *Rme-8-Ri;w-Ri*  $n = 76$ , *Hrs-Ri;w-Ri*  $n = 33$ , *Hrs-Ri;Rme-8-Ri*  $n = 42$ , and *Vps26-Ri;Rme-8-Ri*  $n = 30$ . Box plots show boxes from 25th to 75th percentiles, whiskers represent maximum and minimum values in the dataset, and lines show the median values. (I) Frequency distribution plots of MVB sizes for each condition.

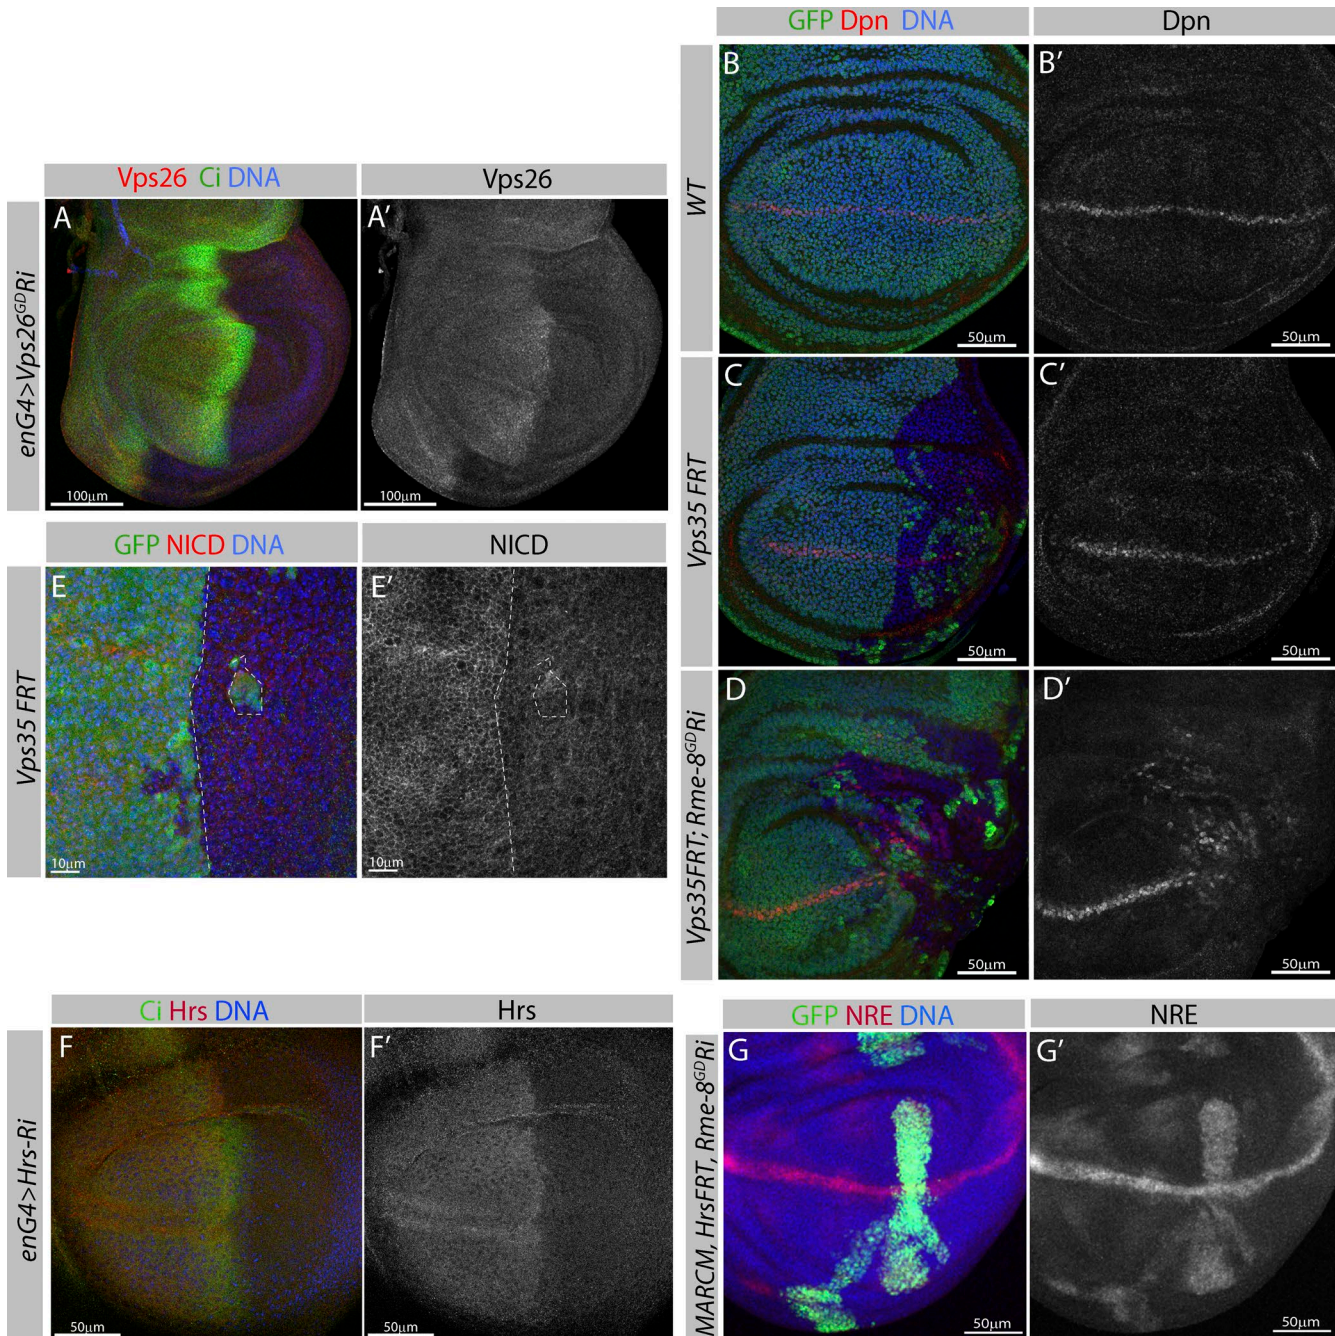

Figure S5. **Retromer and ESCRT-0 Ri validation and phenotypes.** (A and A') Wing disc stained for Hoechst, Ci, and Vps26 to show the knockdown effect of the *Vps26-Ri* line using *en-Gal4* to direct its expression. (B–D') Wing discs stained for Hoechst and GFP. Dpn expression (red in B–D; white in B'–D') is up-regulated in *Vps35* mutant clones (absence of GFP) expressing *Rme-8Ri* under *hh-Gal4* control (D) compared with WT (A) or *Vps35* mutant alone (B). (E and E') Wing discs stained for Hoechst (blue) and GFP. Membrane levels of Notch (red) are reduced in *Vps35* mutant clones (absence of GFP). (F and F') Wing disc stained for Hoechst (blue), Ci, and Hrs to show the knockdown effect of the *Hrs-Ri* line using *en-Gal4* to direct its expression. (G and G') NRE-mCherry expression (red in G; white in G') is up-regulated autonomously in *Hrs* mutant clones (GFP<sup>+</sup>) expressing *Rme-8Ri*.

Table S1. Details of *Drosophila* strains

| Strains            | Summary                                                                                                                                                                                                                                                       | Reference                                |
|--------------------|---------------------------------------------------------------------------------------------------------------------------------------------------------------------------------------------------------------------------------------------------------------|------------------------------------------|
| Rme-8 Ri GD        | 322 bp hairpin against exon 7                                                                                                                                                                                                                                 | VDRC 22671                               |
| Rme-8-Ri KK        | 768 bp hairpin against exon7                                                                                                                                                                                                                                  | VDRC 107706                              |
| w-Ri               | 21 bp hairpin against exon 4                                                                                                                                                                                                                                  | BL 35573                                 |
| Su(H)-Ri           | 431 bp hairpin against exon 3                                                                                                                                                                                                                                 | BL 28900                                 |
| Dx-Ri GD           | 338 bp hairpin against exon 1                                                                                                                                                                                                                                 | VDRC 7795                                |
| Dx-Ri KK           | 301 bp hairpin against exon 2                                                                                                                                                                                                                                 | VDRC 106086                              |
| Vps26-Ri           | 321 bp hairpin against exon 2                                                                                                                                                                                                                                 | VDRC 18396                               |
| Vps26-Ri           | 21 bp hairpin against exon 2                                                                                                                                                                                                                                  | BL 38937                                 |
| Hrs-Ri             | 21 bp hairpin against exon 4                                                                                                                                                                                                                                  | BL 33900                                 |
| Hrs-Ri             | 21 bp hairpin against exon 4                                                                                                                                                                                                                                  | BL 34086                                 |
| Stam-Ri            | 361 bp hairpin against exon 3                                                                                                                                                                                                                                 | VDRC 22497                               |
| KuzDN              | Dominant-negative construct expressing a version of Kux lacking the metalloprotease domain                                                                                                                                                                    | BL 6578; Pan and Rubin, 1997             |
| UAS-Dx             | Full-length Deltex cloned in pUAST plasmid                                                                                                                                                                                                                    | Matsuno et al., 2002                     |
| UAS-Su(dx)         | Full open reading frame of Su(dx) inserted into the pUAST vector                                                                                                                                                                                              | Cornell et al., 1999                     |
| SalEPv-Gal4        | 1,080 bp fragment from the sal enhancer (salEPv) clones into pW8-Gal4                                                                                                                                                                                         | Cruz et al., 2009                        |
| Rme-8 C19          | X-ray mutagenesis                                                                                                                                                                                                                                             | Chang et al., 2004                       |
| Rme-8 A9           | X-ray mutagenesis                                                                                                                                                                                                                                             | Chang et al., 2004                       |
| Vps35 MH20         | A 2-kb deletion that removes the first three exons including the translation start site obtained by <i>P</i> element imprecise excision                                                                                                                       | Franch-Marro et al., 2008                |
| Hrs D28            | Nonsense mutation at amino acid Q270                                                                                                                                                                                                                          | Lloyd et al., 2002                       |
| NRE-Cherry         | Three copies of Gbe palindromic binding site plus the Su(H) binding sites from the E(Spl) m8 gene, upstream of the hsp70 minimal promoter controlling the expression of mCherry inserted using the FC31 system                                                | Housden et al., 2012                     |
| NRE-GFP            | Three copies of Gbe palindromic binding site plus the Su(H) binding sites from the E(Spl) m8 gene, upstream of the hsp70 minimal promoter controlling the expression of EGFP inserted using the FC31 system                                                   | Housden et al., 2012                     |
| Tub-Rab4-mCherry   | Construct generated by slice over extension PCR from EST-clone RE40706 (DGRC) and mCherry-cDNA (pAB118-mCherry) and cloned into pCasp-tubPromoter-3'UTR                                                                                                       | Yousefian et al., 2013                   |
| UAS-GFP-myc-2xFYVE | Two FYVE fingers from Hrs (aa 147–223) separated by the linker QGQGA and tagged with a myc and EGFP epitope in the N terminus cloned into pUAST vector                                                                                                        | Wucherpennig et al., 2003                |
| UAS-Lamp1-GFP      | Cleavable preprolactin signal sequenced followed by EGFP and a transmembrane domain and cytoplasmic tail derived from human LAMP1 cloned into the pUAST vector                                                                                                | BL 42714; Pulipparacharuvil et al., 2005 |
| Notch-GFP          | Rescue construct containing 44,868 nucleotides from –6,233 nucleotides upstream the transcription start site to 1,245 nucleotides downstream of the 3'UTR cloned into attb-P(acman)-ApR vector and a GFP inserted in intracellular domain of Notch (aa 2,388) | Couturier et al., 2013                   |

DGRC, *Drosophila* Genomics Resource Center; BL, Bloomington Stock Center; VDRC, Vienna *Drosophila* Resource Center.

Table S2. Details of primary antibodies

| Antibody | Dilution | Antigen                                                                                           | Reference                             |
|----------|----------|---------------------------------------------------------------------------------------------------|---------------------------------------|
| Mo NICD  | 1:20     | Intracellular domain of <i>Drosophila</i> Notch, amino acids 1,791–2,504                          | C17.9C6 DSHB; Fehon et al., 1990      |
| Mo NECD  | 1:20     | EGF repeats 12–20 of the extracellular domain of <i>Drosophila</i> Notch                          | C458.2H DSHB; Diederich et al., 1994  |
| Rat NECD | 1:500    | Extracellular domain of <i>Drosophila</i> Notch                                                   | Fehon et al., 1990                    |
| Mo Wg    | 1:20     | Wg amino acids 3–468 fused to TrpE                                                                | 4E4 DSHB; van den Heuvel et al., 1989 |
| GP DI    | 1:3,000  | EGF-like repeats 4–9, amino acids 350–529, of <i>Drosophila</i> DI fused to $\beta$ -galactosides | Huppert et al., 1997                  |
| Rat Ci   | 1:20     | amino acids 700–850 (C terminus of the Zn finger domain) of Ci fused to GST                       | 2A1 DSHB; Motzny and Holmgren, 1995   |
| Rb GFP   | 1:1,000  | Polyclonal against GFP isolated directly from jellyfish <i>Aequorea victoria</i>                  | A6455 Invitrogen                      |
| Rb dsRed | 1:200    | Polyclonal                                                                                        | 632496 Takara Bio Inc.                |
| Rb Rab7  | 1:3,000  | Synthetic peptide CNDFPDQITLGSQNNRPG, amino acid residues 184–200 of <i>Drosophila</i> Rab7       | Tanaka and Nakamura, 2008             |
| Rb Rab11 | 1:8,000  | Synthetic peptide CSQKQIRDPPGEDVI, amino acid residues 177–191 of <i>Drosophila</i> Rab11         | Tanaka and Nakamura, 2008             |
| Rb Rab5  | 1:500    | Synthetic peptide covering amino acids 200 to C terminus of Rab5 fused to KLH                     | 31261 Abcam                           |
| GP Hrs   | 1:1,000  | N-terminal domain of HRS fused to GST                                                             | Lloyd et al., 2002                    |
| Rb Lva   | 1:500    | Fragment close to the C terminus domain of Lavalamp fused to GST                                  | Sisson et al., 2000                   |
| Rb Avl   | 1:1,000  | Peptide covering amino acids 1–258 from avl cDNA fused to GST                                     | Lu and Bilder, 2005                   |
| Rb SARA  | 1:500    | C-terminal 174 amino acids fused to GST                                                           | Coumilleau et al., 2009               |
| GP Vps26 | 1:1,000  | Full-length Vps26 protein fused to Hisx6                                                          | Wang et al., 2014                     |

Mo, mouse; GP, guinea pig; Rb, rabbit.

Table S3. Details of secondary antibodies

| Antibody             | Specificity                          | Catalog number                                        |
|----------------------|--------------------------------------|-------------------------------------------------------|
| Donkey anti-Mo FITC  | AffiniPure donkey anti-Mo IgG (H+L)  | 715-095-151 Jackson ImmunoResearch Laboratories, Inc. |
| Donkey anti-Mo Cy3   | AffiniPure donkey anti-Mo IgG (H+L)  | 715-165-151 Jackson ImmunoResearch Laboratories, Inc. |
| Donkey anti-Mo Cy5   | AffiniPure donkey anti-Mo IgG (H+L)  | 715-175-151 Jackson ImmunoResearch Laboratories, Inc. |
| Donkey anti-Mo 488   | Donkey anti-Mo IgG (H+L)             | A21202 Invitrogen                                     |
| Donkey anti-Rb FITC  | AffiniPure donkey anti-Rb IgG (H+L)  | 711-095-152 Jackson ImmunoResearch Laboratories, Inc. |
| Goat anti-Rb Cy3     | AffiniPure goat anti-Rb IgG (H+L)    | 111-165-144 Jackson ImmunoResearch Laboratories, Inc. |
| Donkey anti-Rb Cy5   | AffiniPure donkey anti-Rb IgG (H+L)  | 711-175-152 Jackson ImmunoResearch Laboratories, Inc. |
| Donkey anti-Rb 568   | Donkey anti-Rb IgG (H+L)             | A10042 Invitrogen                                     |
| Donkey anti-rat FITC | AffiniPure donkey anti-rat IgG (H+L) | 712-095-153 Jackson ImmunoResearch Laboratories, Inc. |
| Donkey anti-rat Cy3  | AffiniPure donkey anti-rat IgG (H+L) | 712-165-153 Jackson ImmunoResearch Laboratories, Inc. |
| Donkey anti-rat Cy5  | AffiniPure donkey anti-rat IgG (H+L) | 712-175-153 Jackson ImmunoResearch Laboratories, Inc. |
| Donkey anti-GP FITC  | AffiniPure donkey anti-GP IgG (H+L)  | 706-095-148 Jackson ImmunoResearch Laboratories, Inc. |
| Donkey anti-GP Cy3   | AffiniPure donkey anti-GP IgG (H+L)  | 706-165-148 Jackson ImmunoResearch Laboratories, Inc. |

Mo, mouse; GP, guinea pig; Rb, rabbit; H+L, heavy and light chain.

## References

- Chang, H.C., M. Hull, and I. Mellman. 2004. The J-domain protein Rme-8 interacts with Hsc70 to control clathrin-dependent endocytosis in *Drosophila*. *J. Cell Biol.* 164:1055–1064. <http://dx.doi.org/10.1083/jcb.200311084>
- Cornell, M., D.A. Evans, R. Mann, M. Fostier, M. Flaszka, M. Monthatong, S. Artavanis-Tsakonas, and M. Baron. 1999. The *Drosophila melanogaster* Suppressor of deltex gene, a regulator of the Notch receptor signaling pathway, is an E3 class ubiquitin ligase. *Genetics.* 152:567–576.
- Coumilleau, F., M. Fürthauer, J.A. Knoblich, and M. González-Gaitán. 2009. Directional Delta and Notch trafficking in Sara endosomes during asymmetric cell division. *Nature.* 458:1051–1055. <http://dx.doi.org/10.1038/nature07854>
- Couturier, L., K. Mazouni, and F. Schweisguth. 2013. Numb localizes at endosomes and controls the endosomal sorting of notch after asymmetric division in *Drosophila*. *Curr. Biol.* 23:588–593. <http://dx.doi.org/10.1016/j.cub.2013.03.002>
- Cruz, C., A. Glavic, M. Casado, and J.F. de Celis. 2009. A gain-of-function screen identifying genes required for growth and pattern formation of the *Drosophila melanogaster* wing. *Genetics.* 183:1005–1026. <http://dx.doi.org/10.1534/genetics.109.107748>
- Diederich, R.J., K. Matsuno, H. Hing, and S. Artavanis-Tsakonas. 1994. Cytosolic interaction between deltex and Notch ankyrin repeats implicates deltex in the Notch signaling pathway. *Development.* 120:473–481.
- Fehon, R.G., P.J. Kooh, I. Rebay, C.L. Regan, T. Xu, M.A.T. Muskavitch, and S. Artavanis-Tsakonas. 1990. Molecular interactions between the protein products of the neurogenic loci Notch and Delta, two EGF-homologous genes in *Drosophila*. *Cell.* 61:523–534. [http://dx.doi.org/10.1016/0092-8674\(90\)90534-L](http://dx.doi.org/10.1016/0092-8674(90)90534-L)
- Franch-Marro, X., F. Wendler, S. Guidato, J. Griffith, A. Baena-Lopez, N. Itasaki, M.M. Maurice, and J.-P. Vincent. 2008. Wingless secretion requires endosome-to-Golgi retrieval of Wntless/Evi/Sprinter by the retromer complex. *Nat. Cell Biol.* 10:170–177. <http://dx.doi.org/10.1038/ncb1678>
- Housden, B.E., K. Millen, and S.J. Bray. 2012. *Drosophila* reporter vectors compatible with  $\Phi$ C31 integrase transgenesis techniques and their use to generate new Notch reporter fly lines. *G3 (Bethesda).* 2:79–82. <http://dx.doi.org/10.1534/g3.111.001321>

- Huppert, S.S., T.L. Jacobsen, and M.A. Muskavitch. 1997. Feedback regulation is central to Delta-Notch signalling required for *Drosophila* wing vein morphogenesis. *Development*. 124:3283–3291.
- Lloyd, T.E., R. Atkinson, M.N. Wu, Y. Zhou, G. Pennetta, and H.J. Bellen. 2002. Hrs regulates endosome membrane invagination and tyrosine kinase receptor signaling in *Drosophila*. *Cell*. 108:261–269. [http://dx.doi.org/10.1016/S0092-8674\(02\)00611-6](http://dx.doi.org/10.1016/S0092-8674(02)00611-6)
- Lu, H., and D. Bilder. 2005. Endocytic control of epithelial polarity and proliferation in *Drosophila*. *Nat. Cell Biol.* 7:1232–1239. <http://dx.doi.org/10.1038/ncb1324>
- Matsuno, K., M. Ito, K. Hori, F. Miyashita, S. Suzuki, N. Kishi, S. Artavanis-Tsakonas, and H. Okano. 2002. Involvement of a proline-rich motif and RING-H2 finger of Deltex in the regulation of Notch signaling. *Development*. 129:1049–1059.
- Motzny, C.K., and R. Holmgren. 1995. The *Drosophila* cubitus interruptus protein and its role in the wingless and hedgehog signal transduction pathways. *Mech. Dev.* 52:137–150. [http://dx.doi.org/10.1016/0925-4773\(95\)00397-J](http://dx.doi.org/10.1016/0925-4773(95)00397-J)
- Pan, D., and G.M. Rubin. 1997. Kuzbanian controls proteolytic processing of Notch and mediates lateral inhibition during *Drosophila* and vertebrate neurogenesis. *Cell*. 90:271–280. [http://dx.doi.org/10.1016/S0092-8674\(00\)80335-9](http://dx.doi.org/10.1016/S0092-8674(00)80335-9)
- Pulipparacharuvil, S., M.A. Akbar, S. Ray, E.A. Sevrioukov, A.S. Haberman, J. Rohrer, and H. Krämer. 2005. *Drosophila* Vps16A is required for trafficking to lysosomes and biogenesis of pigment granules. *J. Cell Sci.* 118:3663–3673. <http://dx.doi.org/10.1242/jcs.02502>
- Sisson, J.C., C. Field, R. Ventura, A. Royou, and W. Sullivan. 2000. Lava lamp, a novel peripheral golgi protein, is required for *Drosophila melanogaster* cellularization. *J. Cell Biol.* 151:905–918. <http://dx.doi.org/10.1083/jcb.151.4.905>
- Tanaka, T., and A. Nakamura. 2008. The endocytic pathway acts downstream of Oskar in *Drosophila* germ plasm assembly. *Development*. 135:1107–1117. <http://dx.doi.org/10.1242/dev.017293>
- van den Heuvel, M., R. Nusse, P. Johnston, and P.A. Lawrence. 1989. Distribution of the wingless gene product in *Drosophila* embryos: a protein involved in cell-cell communication. *Cell*. 59:739–749. [http://dx.doi.org/10.1016/0092-8674\(89\)90020-2](http://dx.doi.org/10.1016/0092-8674(89)90020-2)
- Wang, S., K.L. Tan, M.A. Agosto, B. Xiong, S. Yamamoto, H. Sandoval, M. Jaiswal, V. Bayat, K. Zhang, W.-L. Charng, et al. 2014. The retromer complex is required for rhodopsin recycling and its loss leads to photoreceptor degeneration. *PLoS Biol.* 12:e1001847. <http://dx.doi.org/10.1371/journal.pbio.1001847>
- Wucherpfennig, T., M. Wilsch-Bräuninger, and M. González-Gaitán. 2003. Role of *Drosophila* Rab5 during endosomal trafficking at the synapse and evoked neurotransmitter release. *J. Cell Biol.* 161:609–624. <http://dx.doi.org/10.1083/jcb.200211087>
- Yousefian, J., T. Troost, F. Grawe, T. Sasamura, M. Fortini, and T. Klein. 2013. Dmon1 controls recruitment of Rab7 to maturing endosomes in *Drosophila*. *J. Cell Sci.* 126:1583–1594. <http://dx.doi.org/10.1242/jcs.114934>
